# Supplementary material for: Traffic noise exposure depresses plasma corticosterone and delays offspring growth in breeding zebra finches
Source: Conserv Physiol. 2019 Oct 11;7(1):coz056. doi: 10.1093/conphys/coz056 (PMC6788579; doi:10.1093/conphys/coz056)
Supplement: Zollinger_et_al_Supplement_coz056 [file zollinger_et_al_supplement_coz056.docx]

Electronic Supplement

# Traffic noise exposure depresses plasma corticosterone and delays offspring growth in breeding zebra finches

Sue Anne Zollinger1,2*, Adriana Dorado-Correa2, Wolfgang Goymann3, Wolfgang Forstmeier4, Ulrich Knief4,5, Ana Maria Bastidas6,Henrik Brumm2

1Department of Natural Sciences, Manchester Metropolitan University, Manchester M1 5GD United Kingdom. [zollinger@orn.mpg.de](mailto:zollinger@orn.mpg.de)

2Communication and Social Behaviour Group and 3Department of Behavioural Neurobiology and

4Department of Behavioural Ecology and Evolutionary Genetics, Max Planck Institute for Ornithology, 82319 Seewiesen, Germany

5Evolutionary and Ecological Genetics Group, and 6Munich Graduate School for Evolution, Ecology and Systematics, Ludwig Maximillians University, 82157 Munich, Germany

Table S1: Outcome of linear mixed-effects models with a Gaussian error structure testing the effects of noise on corticosterone leves, H/L ratio, reproductive success and extra-pair paternity of adult zebra finches exposed to traffic noise or a no-noise control treatment. The dependent variables were Z-transformed according to Gelman and Hill (2007), and these scaled values were used in the estimations of effect sizes presented in the forest plot summary graph, Figure 3.

| Dependent Var | Random effects | Variance | Levels/Obs |  |  |  |  |
| --- | --- | --- | --- | --- | --- | --- | --- |
| **Mass day 10** | **MotherID** | **0.70** | **39** |  |  |  |  |
|  | FatherID | 0.00 | 33 |  |  |  |  |
|  | AviaryID | 0.01 | 6 |  |  |  |  |
|  | Residual | 1.05 |  |  |  |  |  |
|  | N |  | 201 |  |  |  |  |
|  | Fixed effects | Estimate | SE | t | p | 95%CI low | 95%CI high |
|  | Intercept | 10.64 | 0.192 | 55.41 |  | 10.254 | 11.011 |
|  | Treatment (noise vs contr) | -0.39 | 0.159 | -2.48 | 0.013 | -0.709 | -0.097 |
|  | Sex (male vs fem) | 0.22 | 0.154 | 1.42 | 0.156 | -0.084 | 0.518 |
|  |  |  |  |  |  |  |  |
| **Mass day 21** | **Random effects** | **Variance** | **Levels/Obs** |  |  |  |  |
|  | MotherID | 0.07 | 39 |  |  |  |  |
|  | FatherID | 0.01 | 33 |  |  |  |  |
|  | AviaryID | 0.12 | 6 |  |  |  |  |
|  | Residual | 1.06 |  |  |  |  |  |
|  | N |  | 192 |  |  |  |  |
|  | Fixed effects | Estimate | SE | t | p | 95%CI low | 95%CI high |
|  | Intercept | 12.23 | 0.199 | 61.31 |  | 11.830 | 12.625 |
|  | Treatment (noise vs contr) | -0.05 | 0.157 | -0.33 | 0.741 | -0.354 | 0.264 |
|  | Sex (male vs fem) | 0.07 | 0.154 | 0.44 | 0.660 | -0.217 | 0.370 |
|  |  |  |  |  |  |  |  |
| **Mass day 120** | **Random effects** | **Variance** | **Levels/Obs** |  |  |  |  |
|  | MotherID | 0.05 | 39 |  |  |  |  |
|  | FatherID | 0.26 | 33 |  |  |  |  |
|  | AviaryID | 0.00 | 6 |  |  |  |  |
|  | Residual | 1.12 |  |  |  |  |  |
|  | N |  | 194 |  |  |  |  |
|  | Fixed effects | Estimate | SE | t | p | 95%CI low | 95%CI high |
|  | Intercept | 14.80 | 0.171 | 86.72 |  | 14.481 | 15.152 |
|  | Treatment (noise vs contr) | -0.23 | 0.171 | -1.36 | 0.174 | -0.566 | 0.091 |
|  | Sex (male vs fem) | -0.15 | 0.162 | -0.94 | 0.347 | -0.483 | 0.170 |
|  |  |  |  |  |  |  |  |
| **H/L ratio (ln transf)** | **Random effects** | **Variance** | **Levels/Obs** |  |  |  |  |
|  | IndividualID | 0.07 | 74 |  |  |  |  |
|  | AviaryID | 0.00 | 6 |  |  |  |  |
|  | Residual | 0.69 |  |  |  |  |  |
|  | N |  | 144 |  |  |  |  |
|  | Fixed effects | Estimate | SE | t | p | 95%CI low | 95%CI high |
|  | Intercept | -0.33 | 0.125 | -2.65 |  | -0.579 | -0.067 |
|  | Treatment (noise vs contr) | -0.22 | 0.139 | -1.58 | 0.114 | -0.492 | 0.055 |
|  | Sex (male vs fem) | -0.31 | 0.153 | -2.04 | 0.041 | -0.602 | -0.018 |
|  |  |  |  |  |  |  |  |
| **Cort (ln transf)** | **Random effects** | **Variance** | **Levels/Obs** |  |  |  |  |
|  | IndividualID | 0.06 | 87 |  |  |  |  |
|  | Individual:treatment | 0.06 |  |  |  |  |  |
|  | AviaryID | 0.06 | 6 |  |  |  |  |
|  | Residual | 0.34 |  |  |  |  |  |
|  | N |  | 629 |  |  |  |  |
|  | Fixed effects | Estimate | SE | t | p | 95%CI low | 95%CI high |
|  | Intercept | 7.01 | 0.128 | 54.99 |  | 6.764 | 7.257 |
|  | Treatment (noise vs contr) | -0.16 | 0.069 | -2.33 | 0.020 | -0.294 | -0.024 |
|  | Period (courtship vs pre) | 0.17 | 0.074 | 2.24 | 0.025 | 0.017 | 0.313 |
|  | Period (nesting vs pre) | 0.19 | 0.074 | 2.54 | 0.011 | 0.038 | 0.329 |
|  | Period (post vs pre) | -0.03 | 0.068 | -0.43 | 0.667 | -0.163 | 0.111 |
|  | Sex (male vs fem) | -0.16 | 0.068 | -2.35 | 0.019 | -0.296 | -0.026 |
|  | Breeding round (2nd vs 1st) | -0.11 | 0.049 | -2.35 | 0.019 | -0.211 | -0.019 |
|  | Sampling order (per min) | 0.26 | 0.029 | 8.91 | <0.0001 | 0.204 | 0.322 |
|  |  |  |  |  |  |  |  |
| **EPP (binomial)** | **Random effects** | **Variance** | **Levels/Obs** |  |  |  |  |
| (42% EPP) | GeneticClutchID | 11.79 | 61 |  |  |  |  |
|  | MotherID | 1.84 | 38 |  |  |  |  |
|  | AviaryID | 0.00 | 12 |  |  |  |  |
|  | N |  | 232 |  |  |  |  |
|  | Fixed effects | Estimate | SE | z | p | 95%CI low | 95%CI high |
|  | Intercept | 0.45 | 1.148 | 0.38 | 0.697 | -1.567 | 2.474 |
|  | Treatment (noise vs contr) | 0.14 | 1.174 | 0.11 | 0.908 | -1.969 | 2.177 |
|  | Order of treatment (noise first vs control first) | -2.47 | 1.378 | -1.79 | 0.074 | -4.706 | -0.178 |
|  | Breeding round (2nd vs 1st) | -0.12 | 1.169 | -0.10 | 0.919 | -2.168 | 1.950 |
|  |  |  |  |  |  |  |  |
| **Embryo mortality (binomial)** | **Random effects** | **Variance** | **Levels/Obs** |  |  |  |  |
| (24% EM) | GeneticPairID | 0.99 | 66 |  |  |  |  |
|  | GeneticMotherID | 1.03 | 40 |  |  |  |  |
|  | GeneticFatherID | 0.00 | 35 |  |  |  |  |
|  | AviaryID | 0.00 | 12 |  |  |  |  |
|  | N |  | 297 |  |  |  |  |
|  | Fixed effects | Estimate | SE | z | p | 95%CI low | 95%CI high |
|  | Intercept | -1.76 | 0.474 | -3.71 | 0.000 | -2.654 | -0.930 |
|  | Treatment (noise vs contr) | 0.20 | 0.363 | 0.55 | 0.579 | -0.467 | 0.872 |
|  | Order of treatment (noise first vs control first) | -0.33 | 0.566 | -0.58 | 0.563 | -1.373 | 0.740 |
|  | Breeding round (2nd vs 1st) | 0.52 | 0.363 | 1.42 | 0.154 | -0.169 | 1.221 |
|  |  |  |  |  |  |  |  |
| **Offspring survival (from early embryo to 120days; binomial)** | **Random effects** | **Variance** | **Levels/Obs** |  |  |  |  |
| (69% survival) | GeneticPairID | 0.00 | 66 |  |  |  |  |
|  | GeneticMotherID | 0.78 | 40 |  |  |  |  |
|  | GeneticFatherID | 0.00 | 35 |  |  |  |  |
|  | AviaryID | 0.00 | 12 |  |  |  |  |
|  | N |  | 297 |  |  |  |  |
|  | Fixed effects | Estimate | SE | z | p | 95%CI low | 95%CI high |
|  | Intercept | 1.32 | 0.353 | 3.75 | 0.000 | 0.583 | 1.998 |
|  | Treatment (noise vs contr) | -0.46 | 0.294 | -1.56 | 0.119 | -1.009 | 0.100 |
|  | Order of treatment (noise first vs control first) | 0.59 | 0.410 | 1.44 | 0.149 | -0.204 | 1.409 |
|  | Breeding round (2nd vs 1st) | -0.73 | 0.294 | -2.48 | 0.013 | -1.296 | -0.162 |

**Table S2.** Microsatellite markers used in the parentage genotyping analysis.

| **chromosome** | **microsatellite** | **start** | **end** | **Microsatellite**  **position** | **primer name** | **Tm (MWG) [°C]** | **sequence** |
| --- | --- | --- | --- | --- | --- | --- | --- |
| *Tgu24* | chr24_2 | 2,054,918 | 2,054,951 | [chr24:2054918-2054951](http://genome.ucsc.edu/cgi-bin/hgTracks?hgsid=210650717&db=taeGut1&position=chr24%3A2054918-2054951) | -F | 59.83 (59.35) | AGCCGAGGAAGGTGGATGTT |
|  |  |  |  |  | -R | 60.3 (59.35) | GGACCCAGCTTTGCCTTGAT |
| *Tgu2* | chr2_47 | 46,750,591 | 46,750,670 | [chr2:46750591-46750670](http://genome.ucsc.edu/cgi-bin/hgTracks?hgsid=210650717&db=taeGut1&position=chr2%3A46750591-46750670) | -F | 59.29 (57.30) | TCCCAAACAGCACTTCCACA |
|  |  |  |  |  | -R | 58.08 (57.30) | TTTGCCCTTACACCACCTGA |
| *Tgu2* | chr2_109 | 109,436,800 | 109,436,848 | [chr2:109436800-109436848](http://genome.ucsc.edu/cgi-bin/hgTracks?hgsid=210650717&db=taeGut1&position=chr2%3A109436800-109436848) | -F | 59.55 (57.30) | TCGTTTGTGCCTCTCGATCA |
|  |  |  |  |  | -R | 58.41 (57.30) | TGTTGCCCTCCAGTCTGAAA |
| *TguZ* | chrZ_34 | 34,494,607 | 34,494,681 | [chrZ:34494607-34494681](http://genome.ucsc.edu/cgi-bin/hgTracks?hgsid=210650717&db=taeGut1&position=chrZ%3A34494607-34494681) | -F | 60.14 (59.35) | CCCTGACACAAAGGCTGCAT |
|  |  |  |  |  | -R | 58.38 (59.35) | GCTCTCAGCCTTGCTGCATA |
| *Tgu15* | chr15_6 | 6,303,384 | 6,303,431 | [chr15:9322101-9322138](http://genome.ucsc.edu/cgi-bin/hgTracks?hgsid=211552843&db=taeGut1&position=chr15%3A9322101-9322138) | -F | 59.93 (59.35) | AGCCGAGGGCCTAAAGATGA |
|  |  |  |  |  | -R | 57.21 (59.35) | GAGCCAGGATGAAAGGAGGT |
| *Tgu1A* | chr1A_39 | 30,057,561 | 30,057,609 | [chr1A:30057561-30057609](http://genome.ucsc.edu/cgi-bin/hgTracks?hgsid=210650717&db=taeGut1&position=chr1A%3A30057561-30057609) | -F | 60.22 (61.78) | GGCTCCTTAAAAGCCCAGCTC |
|  |  |  |  |  | -R | 53.40 (61.40) | CTCTGCTGGACCCTCTCTAG |
| *Tgu22* | chr22_3 | 2,509,679 | 2,509,714 | [chr22:2509679-2509714](http://genome.ucsc.edu/cgi-bin/hgTracks?hgsid=210650717&db=taeGut1&position=chr22%3A2509679-2509714) | -F | 60.15 (59.35) | TGGCCTTGCTGACTTCTGCT |
|  |  |  |  |  | -R | 58.82 (59.35) | AGCAGGTTGTGAGGGCTTGT |
| *Tgu3* | chr3_58 | 58,288,041 | 58,288,084 | [chr3:58288041-58288084](http://genome.ucsc.edu/cgi-bin/hgTracks?hgsid=210650717&db=taeGut1&position=chr3%3A58288041-58288084) | -F | 59.87 (59.35) | CCTGATTCACCATGCCCAGT |
|  |  |  |  |  | -R | 59.90 (60.65) | AAAGGGCAGAAGGTAGACCATGA |
| *Tgu11* | chr11_8 | 8,246,464 | 8,246,538 | [chr11:8246464-8246538](http://genome.ucsc.edu/cgi-bin/hgTracks?hgsid=210650717&db=taeGut1&position=chr11%3A8246464-8246538) | -F | 60.09 (59.35) | TTGCAGGCAGGTTCAGTGTG |
|  |  |  |  |  | -R | 60.10 (59.35) | TGGTTGCCTGGAGAAGATGG |
| *Tgu27* | chr27_1 | 1,136,423 | 1,136,454 | [chr27:1136423-1136454](http://genome.ucsc.edu/cgi-bin/hgTracks?hgsid=210650717&db=taeGut1&position=chr27%3A1136423-1136454) | -F | 56.52 (59.82) | GATCTGGAAATACCCTGGAGC |
|  |  |  |  |  | -R | 59.48 (60.25) | TGAAGCATTTCCCTCTGGAGTC |
| *Tgu5* | chr5_34 | 34,270,805 | 34,270,919 | [chr5:34270805-34270919](http://genome.ucsc.edu/cgi-bin/hgTracks?hgsid=210650717&db=taeGut1&position=chr5%3A34270805-34270919) | -F | 58.46 (59.35) | GCAACTGCTGCTCTGAAGGA |
|  |  |  |  |  | -R | 59.78 (59.35) | AGCTGCACATGGGGAAGCTA |
| *Tgu6* | chr6_16 | 16,264,863 | 16,264,907 | [chr6:16264863-16264907](http://genome.ucsc.edu/cgi-bin/hgTracks?hgsid=210650717&db=taeGut1&position=chr6%3A16264863-16264907) | -F | 59.95 (59.35) | TCTGCCGTGTGTGTTTCTGG |
|  |  |  |  |  | -R | 59.74 (59.35) | TAGCCATCTGGGCTCCTCAA |

**R Scripts used in analyses**

rm(list=ls())

library(lme4)

library(arm)

# (1) Body mass ----------------------------------------------------------------------------------

dat <- read.table(paste(path,"data_mass.txt",sep=""), sep="\t", header=TRUE)

dat10 <- subset(dat, day==10)

dat21 <- subset(dat, day==21)

dat120 <- subset(dat, day==120)

mod1 <- lmer(scale(mass) ~ factor(treat) + factor(sex) + (1|MoID) + (1|FaID) + (1|aviary), data=dat10)

summary(mod1)

sim.mod1 <- fixef(sim(mod1, n=2000))

quantile(sim.mod1[,1],c(0.025,0.975))

quantile(sim.mod1[,2],c(0.025,0.975))

quantile(sim.mod1[,3],c(0.025,0.975))

mod2 <- lmer(scale(mass) ~ factor(treat) + factor(sex) + (1|MoID) + (1|FaID) + (1|aviary), data=dat21)

summary(mod2)

sim.mod2 <- fixef(sim(mod2, n=2000))

quantile(sim.mod2[,1],c(0.025,0.975))

quantile(sim.mod2[,2],c(0.025,0.975))

quantile(sim.mod2[,3],c(0.025,0.975))

mod3 <- lmer(scale(mass) ~ factor(treat) + factor(sex) + (1|MoID) + (1|FaID) + (1|aviary), data=dat120)

summary(mod3)

sim.mod3 <- fixef(sim(mod3, n=2000))

quantile(sim.mod3[,1],c(0.025,0.975))

quantile(sim.mod3[,2],c(0.025,0.975))

quantile(sim.mod3[,3],c(0.025,0.975))

# (2) H/L ----------------------------------------------------------------------------------------

dat <- read.table(paste(path,"data_hlratio.txt",sep=""), sep="\t", header=TRUE)

dat$LOGratio <- log(dat$ratio)

mod4 <- lmer(scale(LOGratio) ~ factor(treat) + factor(sex) + (1|ID) + (1|Aviary), data=dat)

summary(mod4)

sim.mod4 <- fixef(sim(mod4, n=2000))

quantile(sim.mod4[,1],c(0.025,0.975))

quantile(sim.mod4[,2],c(0.025,0.975))

quantile(sim.mod4[,3],c(0.025,0.975))

# (3) Cort ---------------------------------------------------------------------------------------

dat <- read.table(paste(path,"data_cort.txt",sep=""), sep="\t", header=TRUE)

dat$LOGcort <- log(dat$cort)

is.numeric(dat$Order)

mod5 <- lmer(scale(LOGcort) ~ factor(treat) + factor(Time) + factor(sex) + factor(Round) + Order + (1|Aviary) + (treat|ID), data=dat)

summary(mod5) # --> very different

sim.mod5 <- fixef(sim(mod5, n=2000))

quantile(sim.mod5[,1],c(0.025,0.975))

quantile(sim.mod5[,2],c(0.025,0.975))

quantile(sim.mod5[,3],c(0.025,0.975))

quantile(sim.mod5[,4],c(0.025,0.975))

quantile(sim.mod5[,5],c(0.025,0.975))

quantile(sim.mod5[,6],c(0.025,0.975))

quantile(sim.mod5[,7],c(0.025,0.975))

quantile(sim.mod5[,8],c(0.025,0.975))

# for Fig

mod5fig <- lmer(LOGcort ~ -1 + trttime + scale(sex) + scale(Round) + scale(Order) + (1|Aviary) + (treat|ID), data=dat)

summary(mod5fig)

# (4) EPP ----------------------------------------------------------------------------------------

dat <- read.table(paste(path,"data_repsuccessNEW.txt",sep=""), sep="\t", header=TRUE)

mod6 <- glmer(epair ~ factor(Treat) + factor(Order) + factor(Round) + (1|gnest) + (1|gmother) + (1|aviary), data=dat, family="binomial")

summary(mod6)

sim.mod6 <- fixef(sim(mod6, n=2000))

quantile(sim.mod6[,1],c(0.025,0.975))

quantile(sim.mod6[,2],c(0.025,0.975))

quantile(sim.mod6[,3],c(0.025,0.975))

quantile(sim.mod6[,4],c(0.025,0.975))

mod6b <- lmer(scale(epair) ~ factor(Treat) + factor(Order) + factor(Round) + (1|gnest) + (1|gmother) + (1|aviary), data=dat)

summary(mod6b)

# (4) Reproductive success -----------------------------------------------------------------------

dat <- read.table(paste(path,"data_repsuccessNEW.txt",sep=""), sep="\t", header=TRUE)

# EM ---

mod7 <- glmer(F2 ~ factor(Treat) + factor(Order) + factor(Round) + (1|gmother) + (1|gfather) + (1|gpairID) + (1|aviary), data=dat, family="binomial")

summary(mod7)

sim.mod7 <- fixef(sim(mod7, n=2000))

quantile(sim.mod7[,1],c(0.025,0.975))

quantile(sim.mod7[,2],c(0.025,0.975))

quantile(sim.mod7[,3],c(0.025,0.975))

quantile(sim.mod7[,4],c(0.025,0.975))

mod7b <- lmer(scale(F2) ~ factor(Treat) + factor(Order) + factor(Round) + (1|gmother) + (1|gfather) + (1|gpairID) + (1|aviary), data=dat)

summary(mod7b)

# ChickMort

mod8 <- glmer(F3 ~ factor(Treat) + factor(Round) + (1|spairID) + (1|snest) + (1|aviary), data=dat, family="binomial")

summary(mod8) # makes no sense because only 7 dead chicks

sim.mod8 <- fixef(sim(mod8, n=2000))

quantile(sim.mod8[,1],c(0.025,0.975))

quantile(sim.mod8[,2],c(0.025,0.975))

quantile(sim.mod8[,3],c(0.025,0.975))

mod8b <- lmer(scale(F3) ~ factor(Treat) + factor(Round) + (1|spairID) + (1|snest) + (1|aviary), data=dat)

summary(mod8b)

# AdultOff

mod9 <- glmer(F6 ~ factor(Treat) + factor(Order) + factor(Round) + (1|gmother) + (1|gfather) + (1|gpairID)+ (1|aviary), data=dat, family="binomial")

summary(mod9) # almost identical to 1-EM

sim.mod9 <- fixef(sim(mod9, n=2000))

quantile(sim.mod9[,1],c(0.025,0.975))

quantile(sim.mod9[,2],c(0.025,0.975))

quantile(sim.mod9[,3],c(0.025,0.975))

quantile(sim.mod9[,4],c(0.025,0.975))

mod9b <- lmer(scale(F6) ~ factor(Treat) + factor(Round) + (1|gmother) + (1|gfather) + (1|gpairID)+ (1|aviary), data=dat)

summary(mod9b)

# ------------------------------------------------------------------------------------------------

**Supplemental literature cited**

Gelman, A. and Hill, J. (2007). Data analysis using regression and hierarchical/multilevel models: Cambridge University Press: Cambridge, UK.

Nakagawa, S. and Cuthill, I. C. (2007). Effect size, confidence interval and statistical significance: a practical guide for biologists. Biological Reviews 82, 591-605.
